# Clinical Significance of Methicillin-Resistant *Staphylococcus aureus* Colonization on Hospital Admission: One-Year Infection Risk

Jessica P. Ridgway<sup>1\*</sup>, Lance R. Peterson<sup>2,3,4</sup>, Eric C. Brown<sup>5</sup>, Hongyan Du<sup>5</sup>, Courtney Hebert<sup>6</sup>, Richard B. Thomson Jr<sup>2,4</sup>, Karen L. Kaul<sup>2,4</sup>, Ari Robicsek<sup>3,4,7</sup>

**1** Department of Medicine, University of Chicago, Chicago, Illinois, United States of America, **2** Department of Pathology, NorthShore University HealthSystem, Evanston, Illinois, United States of America, **3** Department of Medicine, NorthShore University HealthSystem, Evanston, Illinois, United States of America, **4** The University of Chicago Pritzker School of Medicine, Chicago, Illinois, United States of America, **5** Center for Clinical and Research Informatics, NorthShore University HealthSystem, Evanston, Illinois, United States of America, **6** Department of Biomedical Informatics, The Ohio State University Medical Center, Columbus, Ohio, United States of America, **7** Department of Clinical Analytics, NorthShore University HealthSystem, Evanston, Illinois, United States of America

## Abstract

**Background:** Methicillin-resistant *Staphylococcus aureus* (MRSA) nasal colonization among inpatients is a well-established risk factor for MRSA infection during the same hospitalization, but the long-term risk of MRSA infection is uncertain. We performed a retrospective cohort study to determine the one-year risk of MRSA infection among inpatients with MRSA-positive nasal polymerase chain reaction (PCR) tests confirmed by positive nasal culture (Group 1), patients with positive nasal PCR but negative nasal culture (Group 2), and patients with negative nasal PCR (Group 3).

**Methodology/Principal Findings:** Subjects were adults admitted to a four-hospital system between November 1, 2006 and March 31, 2011, comprising 195,255 admissions. Patients underwent nasal swab for MRSA PCR upon admission; if positive, nasal culture for MRSA was performed; if recovered, MRSA was tested for Panton-Valentine Leukocidin (PVL). Outcomes included MRSA-positive clinical culture and skin and soft tissue infection (SSTI). Group 1 patients had a one-year risk of MRSA-positive clinical culture of 8.0% compared with 3.0% for Group 2 patients, and 0.6% for Group 3 patients ( $p < 0.001$ ). In a multivariable model, the hazard ratios for future MRSA-positive clinical culture were 6.52 (95% CI, 5.57 to 7.64) for Group 1 and 3.40 (95% CI, 2.70 to 4.27) for Group 2, compared with Group 3 ( $p < 0.0001$ ). History of MRSA and concurrent MRSA-positive clinical culture were significant risk factors for future MRSA-positive clinical culture. Group 1 patients colonized with PVL-positive MRSA had a one-year risk of MRSA-positive clinical culture of 10.1%, and a one-year risk of MRSA-positive clinical culture or SSTI diagnosis of 21.7%, compared with risks of 7.1% and 12.5%, respectively, for patients colonized with PVL-negative MRSA ( $p = 0.04$ ,  $p = 0.005$ , respectively).

**Conclusions/Significance:** MRSA nasal colonization is a significant risk factor for future MRSA infection; more so if detected by culture than PCR. Colonization with PVL-positive MRSA is associated with greater risk than PVL-negative MRSA.

**Citation:** Ridgway JP, Peterson LR, Brown EC, Du H, Hebert C, et al. (2013) Clinical Significance of Methicillin-Resistant *Staphylococcus aureus* Colonization on Hospital Admission: One-Year Infection Risk. PLoS ONE 8(11): e79716. doi:10.1371/journal.pone.0079716

**Editor:** Gerardo Chowell, Arizona State University, United States of America

**Received:** May 15, 2013; **Accepted:** October 4, 2013; **Published:** November 20, 2013

**Copyright:** © 2013 Ridgway et al. This is an open-access article distributed under the terms of the Creative Commons Attribution License, which permits unrestricted use, distribution, and reproduction in any medium, provided the original author and source are credited.

**Funding:** Funding was provided by a NorthShore University HealthSystem research career development award awarded to Dr. Robicsek. The funders had no role in study design, data collection and analysis, decision to publish, or preparation of the manuscript.

**Competing Interests:** Dr. Peterson reports receiving research grants from BD Diagnostics, Cepheid, MicroPhage, Nanogen, Nanosphere, NIAID, Roche, Syntezza, 3M, AHRQ, Wyeth (Pfizer), and consulting for BD Diagnostics, Cepheid, Nanosphere, Wyeth (Pfizer), and Roche. Dr. Thomson reports receiving research grants from GlaxoSmithKline and Nanosphere, consulting for Nanosphere and Copan, receiving lecture honoraria from BD GeneOhm and Nanosphere, and receiving a project grant from Jones Group. The other authors have declared that no competing interests exist. This does not alter the authors adherence to all the PLOS ONE policies on sharing data and materials.

\* E-mail: Jessica.Ridgway@uchospitals.edu

## Introduction

Owing to heightened concerns about healthcare-associated infections, hospitals often test asymptomatic inpatients for colonization with methicillin-resistant *Staphylococcus aureus* (MRSA) [1]. These tests regularly uncover previously unknown colonization; indeed, 1.5% of the population of the United States carries this organism [2] and prevalence of MRSA colonization upon hospital admission ranges from 3.9% to 13.6% [1,3–5]. The implications for patients of being found colonized are unclear.

Previous work has suggested that inpatients colonized with MRSA are at risk for MRSA infection during the same hospitalization [1,6–14]. One study found this risk to be 11.1% [7]. Another study showed that of patients colonized with MRSA in the intensive care unit (ICU), 38% went on to develop MRSA bacteremia during their ICU stay [14]. Yet the literature addressing the long-term risk of MRSA infection in MRSA-colonized patients is limited. Previous studies relied on small sample sizes or focused on high-risk patient populations [9,15–19].

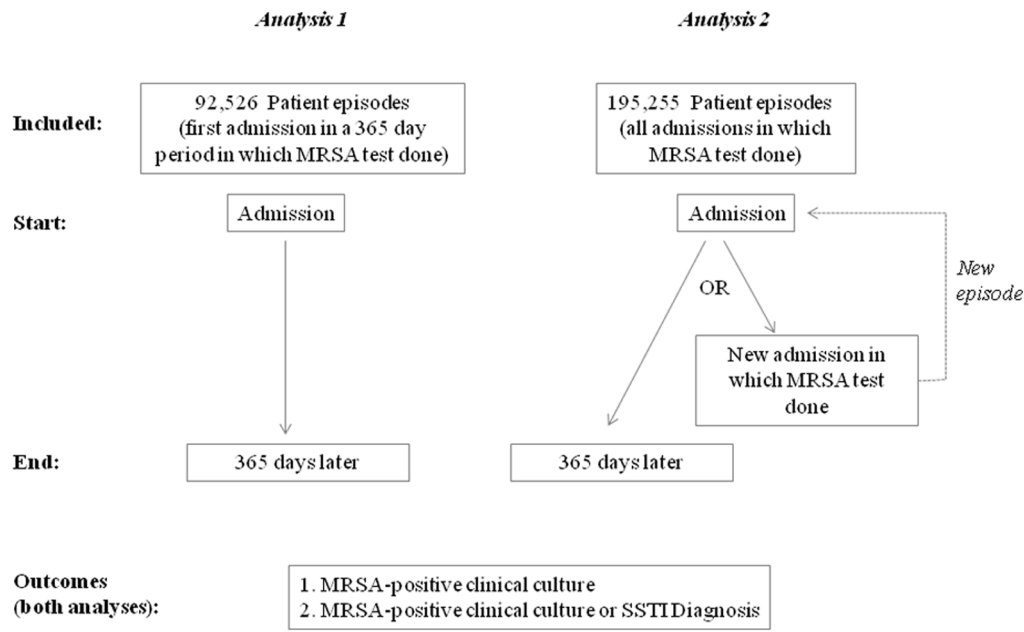

**Figure 1. Summary of Analyses.** In Analysis 1, patients were followed for 365 days for the outcomes of interest. In Analysis 2, an ‘episode’ was defined as the time from the admission test until the first of these occurrences: a) 365 days elapsed; b) the patient was readmitted and underwent another surveillance test (and thus potentially re-categorized); c) the patient experienced the outcome of interest. Upon readmission, a new episode began and the patient was re-categorized into Group 1, 2, or 3 according to the results of the new nasal swab. doi:10.1371/journal.pone.0079716.g001

Further uncertainties exist. Polymerase Chain Reaction (PCR) has come into wide use as a test method in part because it is thought to have superior sensitivity to culture [20,21]. However, the accuracy of a PCR assay is hard to define in the absence of a culture-based gold standard. In other words, the clinical significance of being nasally “colonized” with PCR-positive but culture-negative MRSA is unclear. This is important because MRSA detected by PCR often cannot be recovered on culture [22,23]. Further, not all MRSA isolates are alike. The last decade has seen the emergence of community-associated MRSA, a distinct form of this organism characterized by specific pulsed-field types, unique epidemiology, a predilection for causing skin infections, and a frequent association with Panton-Valentine Leukocidin (PVL), a virulence factor whose clinical significance is a subject of controversy [24–27]. Thus, the implications for the patient found to carry MRSA may differ based on the type of test used for detection and the variety of MRSA found.

For several years at our four-hospital healthcare organization, universal testing for MRSA nasal colonization with PCR was performed upon admission, and confirmatory culture was done on all positives. Furthermore, all isolates were tested for the presence of PVL. In this context, we conducted a retrospective cohort study of over 100,000 MRSA-tested patients to determine the influence of MRSA colonization status on one-year risk of MRSA infection.

## Methods

### Ethics Statement

This study was approved by the NorthShore University HealthSystem Institutional Review Board (IRB). Written patient consent was not obtained as a waiver of consent was granted by the IRB.

### Study Overview and Data Collection

This was a retrospective cohort study in which we tracked patients for up to a year following an admission MRSA test to determine the risk of future MRSA-positive clinical culture and physician-diagnosed skin and soft tissue infection (SSTI).

Participants were all patients older than 18 years of age admitted to any of the four hospitals within the NorthShore University HealthSystem (NorthShore) network (formerly Evanston Northwestern Healthcare) between November 1, 2006 and March 31, 2011 who were tested for MRSA nasal colonization. Throughout the study period, a policy of universal MRSA admission testing was in effect for all adults. This program was adopted in an effort to eliminate healthcare-associated MRSA infections in a moderate-incidence setting, and has been previously described [3].

Admission testing was obtained by sampling both anterior nares with double-headed premoistened swabs (BBL CultureSwab; Becton Dickinson, Franklin Lake, NJ). These were processed with the BD-GeneOhm real-time PCR test for MRSA (Becton Dickinson). To confirm the presence of MRSA, samples with positive PCR results underwent broth enrichment and were cultured on colistin-nalidixic acid agar with 5% sheep blood (Remel, Lenexa, KS) and subcultured to MRSA CHROMagar (Becton Dickinson, Franklin Lake, NJ). Colonies underwent Staphaurex latex agglutination test (Murex Biotech, Dartford, United Kingdom) followed by PCR testing for the presence of the *mecA* gene. All nasal cultures positive for MRSA from April 19, 2007 through the end of the study period were further tested for PVL by PCR detection of the *lukF* gene [28].

Patients were classified into three Groups at the time of admission: Group 1 - positive MRSA PCR test with positive confirmatory culture; Group 2 - positive MRSA PCR test but negative confirmatory culture (i.e. positive PCR was of uncertain significance); Group 3 - negative MRSA PCR.

**Table 1.** Baseline Characteristics of Patient Episodes in Analysis 1.

| Baseline Characteristic                                           | Group 1 (PCR+/NC+) (n = 2631) | Group 2 (PCR+/NC-) (n = 1234) | Group 3 (PCR-) (n = 88661) |
|-------------------------------------------------------------------|-------------------------------|-------------------------------|----------------------------|
| Age, median (IQR), y                                              | 75 (56–85)                    | 63 (46–80)                    | 58 (39–76)                 |
| Female, sex                                                       | 1499 (57.0)                   | 747 (60.5)                    | 56671 (63.9)               |
| African American                                                  | 221 (8.4)                     | 126 (10.2)                    | 6432 (7.3)                 |
| American Indian                                                   | 3 (0.1)                       | 5 (0.4)                       | 289 (0.3)                  |
| Asian/Pacific Islander                                            | 49 (1.9)                      | 41 (3.3)                      | 2641 (3.0)                 |
| Caucasian                                                         | 2102 (80.0)                   | 861 (69.9)                    | 65764 (74.3)               |
| Hispanic                                                          | 31 (1.2)                      | 39 (3.2)                      | 3542 (4.0)                 |
| Other                                                             | 221 (8.4)                     | 160 (13.0)                    | 9899 (11.2)                |
| Long-term care facility residence                                 | 468 (17.8)                    | 119 (16.1)                    | 2280 (2.6)                 |
| Hospitalization in prior year                                     | 556 (21.1)                    | 168 (13.6)                    | 6836 (7.7)                 |
| Pressure ulcer in prior year                                      | 549 (20.9)                    | 132 (10.7)                    | 3652 (4.1)                 |
| Weight >80 kg                                                     | 1109 (42.2)                   | 549 (44.5)                    | 39063 (44.1)               |
| Surgical patient (surgery within next 7 days)                     | 315 (12.0)                    | 317 (25.7)                    | 21009 (23.7)               |
| Charlson comorbidity index, median (IQR, no. with data available) | 1 (0–2, n = 2529)             | 0 (0–1, n = 1185)             | 0 (0–0, n = 86509)         |
| Modified APS, median (IQR, no. with data available)               | 11 (8–14, n = 1959)           | 10 (7–13, n = 801)            | 9 (6–12, n = 48818)        |

Abbreviations: IQR, interquartile range; NC, nasal culture; PCR, polymerase chain reaction; APS, Acute Physiology Score.

Data are reported as No. (%) unless otherwise indicated.

doi:10.1371/journal.pone.0079716.t001

We used the NorthShore Enterprise Data Warehouse (EDW) [29,30] to obtain data regarding each patient's characteristics at the time of admission. These included a measure of chronic medical comorbidity, the Charlson comorbidity index [31], and a measure of disease acuity, the Modified Acute Physiology Score (APACHE II score without points for Glasgow Coma Scale) [32].

We followed patients for two outcomes: future MRSA-positive clinical culture and future SSTI. 'Future MRSA-positive clinical cultures' were positive non-surveillance cultures collected between 8 and 365 days after the admission surveillance test (i.e. clinical cultures obtained as part of a work-up for infection that grew MRSA). Positive cultures collected 4–7 days after the admission test were all reviewed and then classified as 'future MRSA-positive clinical cultures' if they were related to a condition acquired after the admission test (e.g. patient admitted for cardiac surgery developed hospital-acquired pneumonia on day 6 after admission). To identify 'future SSTI,' we reviewed all physician-documented (not administrative) diagnoses given to patients between 8 and 365 days following the admission test.

In addition to the above data, we also used the EDW to identify positive MRSA clinical cultures prior to admission (>7 days before the admission test) or concurrent with the admission test (7 days before through 3 days after admission test, and 4–7 days after the admission test if chart review revealed the clinical infection to be present at the time of the admission test). Furthermore, to control for the impact of mupirocin-based decolonization therapy on the risk of MRSA infection (physicians prescribed a five-day decolonization regimen for PCR-positive patients at their own discretion), we determined whether each patient had been treated with mupirocin within 7 days of an admission test.

Two analyses were performed using the data collected. The aim of the first analysis was to determine the one-year risk of future MRSA-positive clinical culture or SSTI, stratified by the following factors: whether a patient's surveillance test was positive, which test was positive (PCR only or PCR and confirmatory culture), and

the PVL status of their MRSA. The aim of the second analysis was to determine the independent influence of the above factors on risk of a subsequent positive clinical culture after controlling for potential confounders.

### Analysis 1: One-Year Infection Risk

In our first analysis, all patients who underwent admission surveillance testing for MRSA between November 1, 2006 and March 31, 2010 were followed for 365 days for the outcomes of interest (Figure 1). After 365 days elapsed from the initial surveillance test, patients were eligible to be re-entered into the study if they were readmitted and had another admission surveillance test performed.

The primary outcome of interest was future MRSA-positive clinical culture, as defined above. Because of concerns that MRSA infections, especially those caused by community-associated MRSA (i.e. SSTI), are often not cultured, we performed an additional analysis for patients with positive MRSA tests in whom the PVL status was known (Group 1 patients from April 19, 2007 onwards) in which the outcome of interest was MRSA-positive clinical culture or SSTI. Only the first outcome in the 365-day follow-up period was included.

Because some positive clinical cultures from non-invasive sources (e.g. sputum, wound) do not represent true infection, we estimated true infection risk in the following way. We classified each clinical culture according to its source: urine, sputum (including Bronchoalveolar Lavage), SSTI (including swabs from abscesses and wounds), invasive, or other (e.g. samples from sinuses, catheters, chronic ulcers, etc.). We then performed chart review to determine whether cultures represented infection or colonization for 100 random cultures of each non-invasive source. Infections were defined in the following way [3]: respiratory tract infection = positive respiratory culture, compatible chest radiograph, and decision to treat with antibiotics; urinary tract infection = positive urine culture and either a decision to treat or

**Table 2.** One-Year Risk of MRSA-positive Clinical Culture Stratified by Group and History of MRSA.

|                                                 | Group 1 (PCR+/NC+) |               |                            | Group 2 (PCR+/NC-) |            |                            | Group 3 (PCR-) |                |                            | Overall P value Among Groups |                 |        |
|-------------------------------------------------|--------------------|---------------|----------------------------|--------------------|------------|----------------------------|----------------|----------------|----------------------------|------------------------------|-----------------|--------|
|                                                 | All Group 1        | Past MRSA*    | No past or concurrent MRSA | All Group 2        | Past MRSA* | No past or concurrent MRSA | All Group 3    | Past MRSA*     | No past or concurrent MRSA |                              | P value         |        |
| One-year risk of MRSA-positive clinical culture | 211/2631 (8.0)     | 58/406 (14.3) | 43/239 (18.0)              | 110/1986 (5.5)     | 3/73 (4.1) | 8/49 (16.3)                | 26/1112 (2.3)  | 523/8866 (5.9) | 60/1053 (5.7)              | 30/162 (18.5)                | 433/87446 (0.5) | <0.001 |
| One-year risk of MRSA-positive clinical culture |                    |               |                            |                    |            |                            |                |                |                            |                              |                 |        |

Abbreviations: NC, nasal culture; PCR, polymerase chain reaction; SSTI, skin and soft tissue infection.

Data are reported as no. episodes with outcome/total no. episodes (%).

\*Includes patients with a history of MRSA clinical culture or a history of Group 1 and excludes patients with concurrent clinical cultures.  
doi:10.1371/journal.pone.0079716.t002

growth of more than 100,000 colony-forming units/mL on urine culture plus at least 50 leukocytes per high-power field on urinalysis; SSTI = either decision to treat with antibiotics or decision to drain (i.e. an abscess); “other” infection = decision to treat with antibiotics. We then calculated the true infection proportion for each source, and multiplied the number of positive clinical cultures by this proportion pro-rated by the frequency of cultures from that source to determine the overall true infection rate. To assess severity and impact of MRSA infections, we determined the percentage of patients with a positive clinical culture who died within 14 days of the culture and whether the cause of death was related to infection.

A potential drawback in this kind of retrospective analysis is outcome misclassification because of loss to follow-up (e.g. unrecognized infections because patients received post-admission care outside of our health network). NorthShore represents the dominant healthcare network in its catchment area, with four hospitals and over 100 outpatient practices in close proximity, with universal participation in a single electronic medical record system and use of a single microbiology laboratory, all of which feed into the Enterprise Data Warehouse. Despite this, some patients do receive care at other ambulatory practices and hospitals outside this network. To address this concern, we performed a sensitivity analysis restricted to patient episodes with excellent follow-up, which we defined as those with a NorthShore primary care provider (PCP) and at least one NorthShore healthcare visit within the subsequent year.

We made comparisons using the Chi square test with Stata 11 statistical software package (StataCorp, College Station, TX).

### Analysis 2: Association between Nasal Colonization and Future Clinical Culture

The second analysis determined the independent influence of nasal colonization status on risk of future MRSA-positive clinical culture in a multivariable model. For this analysis, all inpatient encounters during the study period were included. Unlike the previous analysis, in Analysis 2 patients were not necessarily followed for an entire year (Figure 1). Rather, an ‘episode’ was defined as the time from the admission test until the first of these occurrences: a) 365 days elapsed; b) the patient was readmitted and underwent another surveillance test (and thus potentially re-categorized); c) the patient experienced the outcome of interest. Upon readmission, a new episode began and the patient was re-categorized into Group 1, 2, or 3 according to the results of the new nasal swab (see above). For Analysis 2, we chose to reclassify patients if their nasal colonization status changed so that we could characterize the association between colonization status and infection risk as accurately as possible. (We did not do this in Analysis 1. There we adopted the perspective of a clinician considering their patient’s one-year risk of infection without knowledge of future test results.) Outcomes of interest in Analysis 2 were as in Analysis 1.

Time-to-event analysis was used to determine the association between nasal colonization (i.e. Group 1, 2 or 3) and the outcomes of interest. Time-to-event difference among groups was depicted using Kaplan-Meier curves and log-rank test, and univariate and multivariable Cox regression modeling were performed [33,34]. The proportionality assumption was assessed and fulfilled for all variables analyzed with this method. As some patients experienced repeated tests and/or recurrent events, a conditional Cox regression model accounting for within-subject correlation was also used [35]. The multivariable models included the following factors to control for underlying differences between patients in the different colonization groups: age, sex, ethnicity, long-term care facility residence, prior history of belonging to Group 1, 2, or 3,

**Table 3.** One-Year Risk of MRSA-positive Clinical Culture Among Patients with Excellent Follow-up Stratified by Group and History of MRSA.

|                                                                                                | Group 1 (PCR+/NC+) |               |              |                       | Group 2 (PCR+/NC-) |            |             |                       | Group 3 (PCR-)  |              |              |                       | Overall P value among groups |
|------------------------------------------------------------------------------------------------|--------------------|---------------|--------------|-----------------------|--------------------|------------|-------------|-----------------------|-----------------|--------------|--------------|-----------------------|------------------------------|
|                                                                                                | All                | Past          | Concurrent   | No past or concurrent | All                | Past       | Concurrent  | No past or concurrent | All             | Past         | Concurrent   | No past or concurrent |                              |
|                                                                                                | Group 1            | MRSA*         | MRSA         | MRSA                  | Group 2            | MRSA*      | MRSA        | MRSA                  | Group 3         | MRSA*        | MRSA         | MRSA                  |                              |
| <b>One-year risk of MRSA-positive clinical culture among patients with excellent follow-up</b> | 84/829 (10.1)      | 27/159 (17.0) | 19/81 (23.5) | 38/589 (6.5)          | 12/427 (2.8)       | 1/26 (3.8) | 3/15 (20.0) | 8/386 (2.1)           | 228/35285 (0.6) | 31/451 (6.9) | 13/59 (22.0) | 184/34775 (0.5)       | <0.001                       |
| <b>One-year risk of MRSA-positive clinical culture among patients with excellent follow-up</b> |                    |               |              |                       |                    |            |             |                       |                 |              |              |                       |                              |

Abbreviations: NC, nasal culture; PCR, polymerase chain reaction.

Data are reported as no. episodes with outcome/total no. episodes (%).

\*Includes patients with a history of MRSA clinical culture or a history of Group 1 and excludes patient episodes with concurrent clinical cultures.

doi:10.1371/journal.pone.0079716.t003

**Table 4.** One-year risk of MRSA-positive Clinical Culture and 'MRSA-positive Clinical Culture or SSTI Diagnosis' in Group 1 Patients According to PVL status.

|                                                                     | PVL positive  | PVL negative    | P value |
|---------------------------------------------------------------------|---------------|-----------------|---------|
| One-year risk of MRSA-positive clinical culture                     | 40/396 (10.1) | 125/1769 (7.1)  | 0.04    |
| One-year risk of 'MRSA-positive clinical culture or SSTI diagnosis' | 86/396 (21.7) | 221/1769 (12.5) | 0.005   |

Abbreviations: PVL, Panton-Valentine Leukocidin; SSTI, skin and soft tissue infection. Data are reported as no. episodes with outcome/total no. episodes (%). doi:10.1371/journal.pone.0079716.t004

hospitalization in the prior year, surgery within the next 7 days, pressure ulcer in the prior year, weight greater than 80 kilograms, and Charlson comorbidity index. A subgroup analysis was performed including Modified Acute Physiology Score as a covariate for the episodes in which it was available (66% of episodes; the remainder of patients did not have all laboratory tests needed for score calculation available within the first 24 hours of admission). In a separate multivariable model for only Group 1 patients (the only patients in whom PVL status was known), prescription of mupirocin and PVL results were included in addition to the above variables. We also performed a sensitivity analysis restricting our analysis to patients with excellent follow-up, as defined previously. Statistical analyses were performed in R 2.15.3 using the RMS and survival packages [36,37] and SAS 9.2 (SAS Institute, Cary, NC).

## Results

### Analysis 1: One-Year Infection Risk

There were 92,526 patient encounters included in Analysis 1, of whom 80,191 were unique patients (Table 1). The one-year risk of future MRSA-positive clinical culture was higher for Group 1

patients (8.0%) than for patients in Group 2 (3.0%) or Group 3 (0.6%), ( $p < 0.001$ ) (Table 2). Risk was higher for patients who had past or concurrent MRSA-positive clinical cultures than for those who were only colonized. Risk was equivalent for all three nasal colonization Groups for patients with a MRSA-positive clinical culture at the time of admission (i.e. concurrent culture) ( $p = 0.94$ ). In the sensitivity analysis, the risk of future positive clinical culture for the subset of patients with excellent follow-up was similar to the risk found in the general population (Table 3), suggesting limited misclassification.

Patients in Group 1 with PVL-positive MRSA colonization had a significantly higher risk of future MRSA-positive clinical culture and 'future MRSA-positive clinical culture or SSTI diagnosis' than those with PVL-negative MRSA (Table 4).

Mupirocin therapy was given in 77% of Group 1, 80% of Group 2, and 4% of Group 3 encounters. The one-year risk of MRSA clinical culture in Group 1 patients was 8.3% for those prescribed mupirocin and 7.4% for those who were not prescribed mupirocin ( $p = 0.54$ ).

Of the 400 MRSA-positive clinical cultures that underwent chart review, 74% of urine cultures, 76% of sputum cultures, 95%

**Table 5.** Baseline Characteristics of Patient Episodes in Analysis 2.

| Baseline Characteristic                                           | Group 1 (PCR+/NC+) (n = 6964) | Group 2 (PCR+/NC-) (n = 3566) | Group 3 (PCR-) (n = 184725) |
|-------------------------------------------------------------------|-------------------------------|-------------------------------|-----------------------------|
| Age, median (IQR), y                                              | 78 (60–86)                    | 71 (53–83)                    | 63 (45–79)                  |
| Female, sex                                                       | 3670 (52.7)                   | 1961 (55.0)                   | 113549 (61.5)               |
| African American                                                  | 621 (8.9)                     | 345 (9.7)                     | 14479 (7.8)                 |
| American Indian                                                   | 8 (0.1)                       | 7 (0.2)                       | 570 (0.3)                   |
| Asian/Pacific Islander                                            | 119 (1.7)                     | 75 (2.1)                      | 5036 (2.7)                  |
| Caucasian                                                         | 5619 (80.8)                   | 2690 (75.5)                   | 138448 (75.0)               |
| Hispanic                                                          | 79 (1.1)                      | 96 (2.7)                      | 6666 (3.6)                  |
| Other                                                             | 512 (7.4)                     | 350 (9.8)                     | 19368 (10.5)                |
| Long-term care facility residence                                 | 2082 (29.9)                   | 758 (21.3)                    | 11254 (6.1)                 |
| Hospitalization in prior year                                     | 3930 (56.4)                   | 1762 (49.4)                   | 50075 (27.1)                |
| Pressure ulcer in prior year                                      | 2223 (31.9)                   | 849 (23.8)                    | 16058 (8.7)                 |
| Weight >80 kg                                                     | 3077 (44.2)                   | 1689 (47.4)                   | 83743 (45.3)                |
| Surgical patient (surgery within next 7 days)                     | 764 (11.0)                    | 732 (20.6)                    | 42533 (23.0)                |
| Charlson comorbidity index, median (IQR, no. with data available) | 2 (0–4, n = 6610)             | 1 (0–3, n = 3218)             | 0 (0–1, n = 178001)         |
| Modified APS, median (IQR, no. with data available)               | 12 (9–16, n = 5667)           | 11 (8–15, n = 2503)           | 10 (7–13, n = 119759)       |

Abbreviations: IQR, interquartile range; NC, nasal culture; PCR, polymerase chain reaction; APS, Acute Physiology Score. Data are reported as No. (%) unless otherwise indicated. doi:10.1371/journal.pone.0079716.t005

**Table 6.** Hazard Ratios for Association Between MRSA Nasal Colonization and Future MRSA-positive Clinical Culture in Multivariable Model Subgroup Analyses.

|                                                         | Group 1 (PCR+/NC+)*HR (95% CI) | P value | Group 2 (PCR+/NC-)*HR (95% CI) | P value |
|---------------------------------------------------------|--------------------------------|---------|--------------------------------|---------|
| All Patients                                            | 6.52 (5.57 to 7.64)            | <0.0001 | 3.40 (2.70 to 4.27)            | <0.0001 |
| Patients with Excellent Follow-up                       | 6.00 (4.25 to 7.78)            | <0.0001 | 4.02 (2.82 to 5.72)            | <0.0001 |
| Patients with Modified Acute Physiology Score Available | 5.95 (5.02 to 7.06)            | <0.0001 | 2.67 (2.03 to 3.52)            | <0.0001 |

Abbreviations: NC, nasal culture; PCR, polymerase chain reaction; HR, hazard ratio.

\*Reference is Group 3 (PCR-).

doi:10.1371/journal.pone.0079716.t006

of SSTI cultures, and 79% of other cultures represented true infections. Future MRSA-positive clinical cultures in the study included 12% invasive, 13% urine, 11% sputum, 45% SSTI, and 19% other cultures, suggesting a total 'true infection' rate of 7.0%, 2.6% and 0.5% in Groups 1, 2, and 3 respectively.

There were 773 episodes associated with a positive clinical culture within the subsequent year. Of these, 54 (7%) died within 14 days of the clinical culture. In 41 patients (76% of those who died), the cause of death was an infection.

#### Analysis 2: Association between Nasal Colonization and Future Clinical Culture

Over the study period, there were 219,244 admissions of which 195,255 (89.1%) were MRSA-tested, representing 109,857 unique patients. (Analysis 2 included more unique patients than Analysis 1

since Analysis 1 was limited to patients for whom an entire year of follow-up was available). There were 10,530 positive PCR tests; 6964 were positive by confirmatory culture (66.1%, Group 1) and in the remaining 3566 MRSA confirmatory cultures were negative (33.9%, Group 2) (Table 5).

In the multivariable model, hazard ratios for future MRSA-positive clinical culture using Group 3 (PCR negative) as the reference group were 6.52 (95% CI, 5.57–7.64;  $p < 0.0001$ ) for Group 1 (PCR positive and confirmatory culture positive) and 3.40 (95% CI, 2.70–4.27;  $p < 0.0001$ ) for Group 2 (PCR positive but confirmatory culture negative). The conditional Cox regression model accounting for recurrent events yielded similar results (data not shown). In subgroup analyses, hazard ratios were similar in the subset of patients with excellent follow-up and in patients for whom a Modified Acute Physiology Score was available (Table 6).

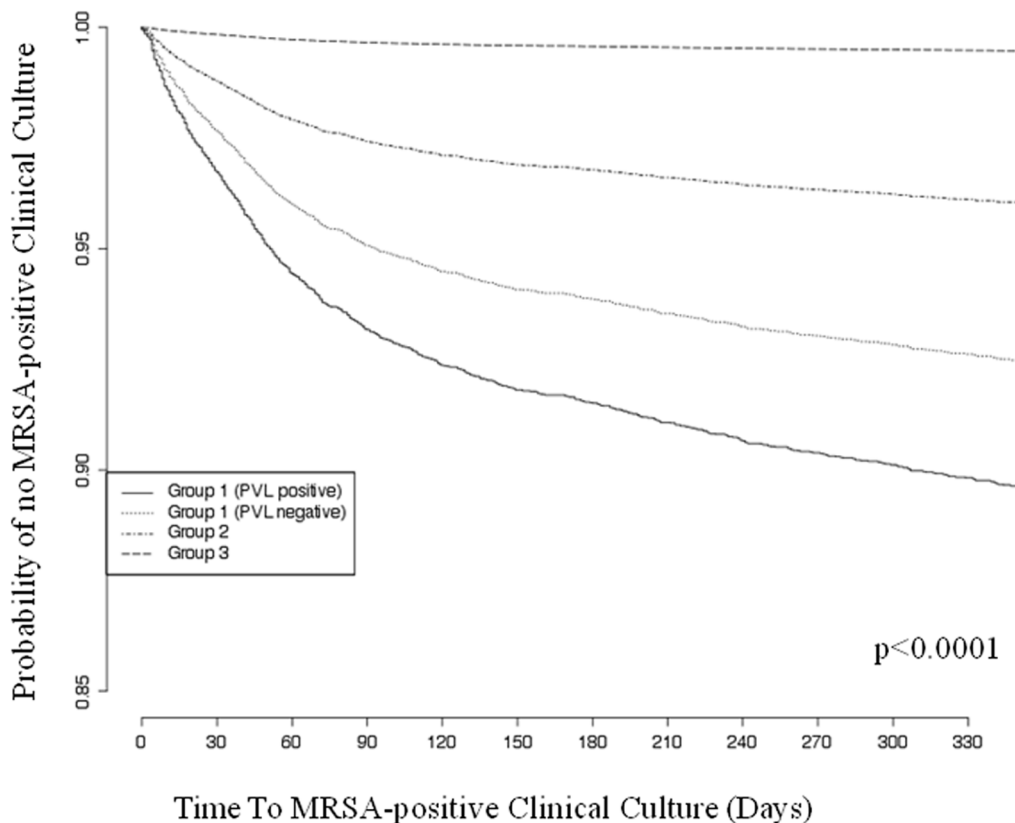**Figure 2.** Kaplan Meier Curve of MRSA-positive Clinical Culture-free Survival Stratified by Group.

doi:10.1371/journal.pone.0079716.g002

In the multivariable model that only included Group 1 patients, individuals colonized with PVL-positive MRSA had an increased risk of future MRSA-positive clinical culture compared with those colonized with PVL-negative MRSA (HR 1.56, 95% CI, 1.02–2.39;  $p = 0.04$ ). They also had an increased risk of the combined outcome ‘future MRSA-positive clinical culture or SSTI diagnosis’ (HR 2.51, 95% CI, 1.95–3.22;  $p < 0.0001$ ). There was no significant difference in the risk of future clinical culture for Group 1 patients prescribed mupirocin compared to Group 1 patients not prescribed mupirocin (HR 1.28, 95% CI, 0.82–2.01;  $p = 0.28$ ). Figure 2 shows future culture-free survival over time by colonization Group and PVL status.

## Discussion

Legislative mandates and concerns regarding healthcare-associated infections have led many healthcare systems – including all hospitals belonging to the United States Veterans Health Administration – to adopt a policy of universal admission testing for MRSA [1,4,38]. Thousands of patients are annually identified as MRSA-colonized, but limited evidence has been available to counsel patients regarding their risk of infection. In a population of more than 100,000 adult patients evaluated for MRSA as a part of a universal surveillance initiative, we characterized infection risk associated with different colonization states.

The one-year risk of having a MRSA-positive clinical culture in patients whose PCR test was positive (Group 1 or 2) was 6.4%, compared to 0.6% if the test was negative. Within the positive-test population, there was considerable variation in that risk, depending on whether the confirmatory culture was positive (8.0% if so, 3.0% if not), whether the patient had a history of a MRSA-positive culture, and whether the MRSA was PVL-positive (10.1% if so, 7.1% if not). Patients with past history of MRSA-positive culture, regardless of Group, were more likely to have a future MRSA-positive clinical culture than those with a positive surveillance PCR test (7.9% vs. 6.4%,  $p = 0.05$ ). No matter the nasal colonization status, patients who presented to the hospital with a culture-positive MRSA infection stood approximately an 18% chance of a future positive culture.

The 7.0% risk of ‘true’ future MRSA infection in culture-proven MRSA-colonized (Group 1) patients in this study was lower than the 10–33% risk estimated in prior studies [9,15–19]. This difference may be due to the composition of our study population. While other studies were largely conducted at tertiary referral centers and identified study participants via targeted screening of high-risk patients or based on positive clinical cultures with MRSA [15–17], we describe outcomes in a population of nearly universally-tested inpatients at four general hospitals in the Midwestern United States.

We found that patients in Group 2 (those with a positive PCR but negative nasal culture) had lower risk of MRSA infection than Group 1 patients. This may indicate that a low density of viable organisms (accounting for negative culture but positive PCR) predicts low risk of eventual infection. Alternatively, Group 2 patients may comprise a mix of patients with true colonization who have the same risk of MRSA-positive culture as Group 1 patients (8%), and patients with false positive tests who have the same risk as Group 3 patients (0.6%). If this is the case, our observed one-year risk of 3% in Group 2 would suggest that

roughly two thirds of Group 2 patients were not actually colonized. As Group 2 patients accounted for 33.9% of all positive PCR tests, as many as 20% of positive PCR tests would have been false positives. Stated differently, much of the apparently greater sensitivity of PCR over culture may actually represent false positive tests. Potential causes for false positives include the presence of *S. aureus* with a staphylococcal cassette chromosome element lacking the *mecA* gene (*mecA* dropout) or a large inoculum of methicillin-sensitive *S. aureus* [21,39].

PVL is a cytotoxin produced by some strains of *S. aureus* that is epidemiologically associated with SSTI and necrotizing pneumonia [40–42] and is closely associated with community-associated MRSA (pulsed-field type USA300) in our population [25,28]. The clinical significance of this virulence factor is disputed; one group has reported increased odds of bacteremia in ICU patients colonized with PVL-positive as opposed to PVL-negative MRSA [43], but others have not found PVL to be associated with worse clinical outcomes [44–46]. We found that colonization with PVL-positive MRSA was associated with increased risk of future MRSA-positive clinical culture compared with colonization with PVL-negative MRSA (HR 1.56). This difference was especially pronounced when uncultured SSTI were included in the analysis.

Our study has limitations. The nares are not the only site of MRSA colonization, and patients who had a negative nasal swab for MRSA may have been colonized at other sites. With the large number of patient encounters included in our study, there was almost certainly loss to follow-up. However, a sensitivity analysis in which we only considered patients with excellent follow-up yielded very similar results. Our primary outcome was future MRSA-positive clinical culture, rather than MRSA infection. While a random record audit found that most positive cultures represented true infections, our results may still overestimate MRSA infection risk. On the other hand, the potential for us to have missed infections without a positive culture or SSTI diagnosis may have caused some risk underestimation. This study included patients from only four hospitals, but the risk of MRSA infection among patients with MRSA nasal colonization was not significantly different between the four hospitals (data not shown), suggesting generalizability.

We have characterized the risk associated with different MRSA surveillance test results in a large universally-tested patient population. These data can be used to improve disease transmission and economic models [47,48], inform infection control and laboratory planning, and guide the process of counseling patients about their risks.

## Acknowledgments

We thank Stephen Weber, MD, MPH from the University of Chicago Department of Medicine for his valuable feedback on the manuscript. We also thank the NorthShore microbiology lab.

## Author Contributions

Conceived and designed the experiments: JR AR. Performed the experiments: JR AR CH. Analyzed the data: JR AR CH HD EB. Contributed reagents/materials/analysis tools: KK LP RT HD EB. Wrote the paper: JR AR. Interpretation of data: JR AR CH KK LP RT. Critical revision of manuscript: JR AR CH KK LP RT.

## References

1. Reilly JS, Stewart S, Christie P, Allardice GM, Stari T, et al. (2012) Universal screening for methicillin-resistant *Staphylococcus aureus* in acute care: risk factors and outcome from a multicentre study. *J Hosp Infect* 80: 31–35.
2. Gorwitz RJ, Kruszon-Moran D, McAllister SK, McQuillan G, McDougal LK, et al. (2008) Changes in the prevalence of nasal colonization with *Staphylococcus aureus* in the United States, 2001–2004. *J Infect Dis* 197: 1226–1234.



3. Robicsek A, Beaumont JL, Paule SM, Hacek DM, Thomson RB, Jr., et al. (2008) Universal surveillance for methicillin-resistant *Staphylococcus aureus* in 3 affiliated hospitals. *Ann Intern Med* 148: 409–418.
4. Jain R, Kralovic SM, Evans ME, Ambrose M, Simbartl LA, et al. (2011) Veterans Affairs initiative to prevent methicillin-resistant *Staphylococcus aureus* infections. *N Engl J Med* 364: 1419–1430.
5. Harbarth S, Fankhauser C, Schrenzel J, Christenson J, Gervaz P, et al. (2008) Universal screening for methicillin-resistant *Staphylococcus aureus* at hospital admission and nosocomial infection in surgical patients. *JAMA* 299: 1149–1157.
6. Bert F, Galdhart JO, Zarrouk V, Le Mee J, Durand F, et al. (2000) Association between nasal carriage of *Staphylococcus aureus* and infection in liver transplant recipients. *Clin Infect Dis* 31: 1295–1299.
7. Coello R, Glynn JR, Gaspar C, Picazo JJ, Fereres J (1997) Risk factors for developing clinical infection with methicillin-resistant *Staphylococcus aureus* (MRSA) amongst hospital patients initially only colonized with MRSA. *J Hosp Infect* 37: 39–46.
8. Corbella X, Dominguez MA, Pujol M, Ayats J, Sendra M, et al. (1997) *Staphylococcus aureus* nasal carriage as a marker for subsequent staphylococcal infections in intensive care unit patients. *Eur J Clin Microbiol Infect Dis* 16: 351–357.
9. Davis KA, Stewart JJ, Crouch HK, Florez CE, Hospenthal DR (2004) Methicillin-resistant *Staphylococcus aureus* (MRSA) nares colonization at hospital admission and its effect on subsequent MRSA infection. *Clin Infect Dis* 39: 776–782.
10. Garrouste-Orgeas M, Timsit JF, Kallel H, Ben Ali A, Dumay MF, et al. (2001) Colonization with methicillin-resistant *Staphylococcus aureus* in ICU patients: morbidity, mortality, and glycopeptide use. *Infect Control Hosp Epidemiol* 22: 687–692.
11. Mest DR, Wong DH, Shimoda KJ, Mulligan ME, Wilson SE (1994) Nasal colonization with methicillin-resistant *Staphylococcus aureus* on admission to the surgical intensive care unit increases the risk of infection. *Anesth Analg* 78: 644–650.
12. Roghmann MC, Siddiqui A, Plaisance K, Standiford H (2001) MRSA colonization and the risk of MRSA bacteraemia in hospitalized patients with chronic ulcers. *J Hosp Infect* 47: 98–103.
13. Squier C, Rihs JD, Risa KJ, Sagnimeni A, Wagener MM, et al. (2002) *Staphylococcus aureus* rectal carriage and its association with infections in patients in a surgical intensive care unit and a liver transplant unit. *Infect Control Hosp Epidemiol* 23: 495–501.
14. Pujol M, Pena C, Pallares R, Ariza J, Ayats J, et al. (1996) Nosocomial *Staphylococcus aureus* bacteremia among nasal carriers of methicillin-resistant and methicillin-susceptible strains. *Am J Med* 100: 509–516.
15. Bendall RP, Gonzalez-Ruiz A, Batiste L, Kelsey MC (1994) Outcome of methicillin-resistant *Staphylococcus aureus* carriage. *Lancet* 344: 819.
16. Datta R, Huang SS (2008) Risk of infection and death due to methicillin-resistant *Staphylococcus aureus* in long-term carriers. *Clin Infect Dis* 47: 176–181.
17. Huang SS, Platt R (2003) Risk of methicillin-resistant *Staphylococcus aureus* infection after previous infection or colonization. *Clin Infect Dis* 36: 281–285.
18. Fishbain JT, Lee JC, Nguyen HD, Mikita JA, Mikita CP, et al. (2003) Nosocomial transmission of methicillin-resistant *Staphylococcus aureus*: a blinded study to establish baseline acquisition rates. *Infect Control Hosp Epidemiol* 24: 415–421.
19. Huang SS, Hinrichsen VL, Datta R, Spurchise L, Miroshnik I, et al. (2011) Methicillin-resistant *Staphylococcus aureus* infection and hospitalization in high-risk patients in the year following detection. *PLoS One* 6: e24340.
20. Diekema D, Johannsson B, Herwaldt L, Beekmann S, Jernigan J, et al. (2011) Current practice in *Staphylococcus aureus* screening and decolonization. *Infect Control Hosp Epidemiol* 32: 1042–1044.
21. Snyder JW, Munier GK, Johnson CL (2010) Comparison of the BD GeneOhm methicillin-resistant *Staphylococcus aureus* (MRSA) PCR assay to culture by use of BBL CHROMagar MRSA for detection of MRSA in nasal surveillance cultures from intensive care unit patients. *J Clin Microbiol* 48: 1305–1309.
22. Paule SM, Mehta M, Hacek DM, Gonzalzes TM, Robicsek A, et al. (2009) Chromogenic media vs real-time PCR for nasal surveillance of methicillin-resistant *Staphylococcus aureus*: impact on detection of MRSA-positive persons. *Am J Clin Pathol* 131: 532–539.
23. Polisen J, Chen S, Cimon K, McGill S, Forward K, et al. (2011) Clinical effectiveness of rapid tests for methicillin resistant *Staphylococcus aureus* (MRSA) in hospitalized patients: a systematic review. *BMC Infect Dis* 11: 336.
24. Boyle-Vavra S, Daum RS (2007) Community-acquired methicillin-resistant *Staphylococcus aureus*: the role of Pantone-Valentine leukocidin. *Lab Invest* 87: 3–9.
25. Voyich JM, Otto M, Mathema B, Braughton KR, Whitney AR, et al. (2006) Is Pantone-Valentine leukocidin the major virulence determinant in community-associated methicillin-resistant *Staphylococcus aureus* disease? *J Infect Dis* 194: 1761–1770.
26. Rolo J, Miragaia M, Turlej-Rogacka A, Empel J, Bouchami O, et al. (2012) High genetic diversity among community-associated *Staphylococcus aureus* in Europe: results from a multicenter study. *PLoS One* 7: e34768.
27. Ellington MJ, Perry C, Ganner M, Warner M, McCormick Smith I, et al. (2009) Clinical and molecular epidemiology of ciprofloxacin-susceptible MRSA encoding PVL in England and Wales. *Eur J Clin Microbiol Infect Dis* 28: 1113–1121.
28. Robicsek A, Beaumont JL, Wright MO, Thomson RB Jr, Kaul KL, et al. (2011) Electronic prediction rules for methicillin-resistant *Staphylococcus aureus* colonization. *Infect Control Hosp Epidemiol* 32: 9–19.
29. Hebert C, Du H, Peterson LR, Robicsek A (2013) Electronic Health Record-Based Detection of Risk Factors for Clostridium difficile Infection Relapse. *Infect Control Hosp Epidemiol* 34: 407–414.
30. Hebert C, Beaumont J, Schwartz G, Robicsek A (2012) The influence of context on antimicrobial prescribing for febrile respiratory illness: a cohort study. *Ann Intern Med* 157: 160–169.
31. Deyo RA, Cherkin DC, Ciol MA (1992) Adapting a clinical comorbidity index for use with ICD-9-CM administrative databases. *J Clin Epidemiol* 45: 613–619.
32. Dubberke ER, Reske KA, Yan Y, Olsen MA, McDonald LC, et al. (2007) *Clostridium difficile*-associated disease in a setting of endemicity: identification of novel risk factors. *Clin Infect Dis* 45: 1543–1549.
33. Therneau TM, Grambsch PM (2000) Modeling Survival Data: Extending the Cox Model. New York: Springer.
34. Harrell FE (2001) Regression modeling strategies: with applications to linear models, logistic regression, and survival analysis: Springer.
35. Hosmer DW, Lemeshow S (1999) Applied survival analysis : regression modeling of time to event data. New York: Wiley. xiii, 386 p.
36. Therneau TM (2013) A Package for Survival Analysis in S.
37. R Development Core Team (2013) R: A Language and Environment for Statistical Computing. Vienna, Austria.
38. California Health and Safety Code §1255.8 (2008).
39. Blanc DS, Basset P, Nahimana-Tessema I, Jatou K, Greub G, et al. (2011) High proportion of wrongly identified methicillin-resistant *Staphylococcus aureus* carriers by use of a rapid commercial PCR assay due to presence of staphylococcal cassette chromosome element lacking the *mecA* gene. *J Clin Microbiol* 49: 722–724.
40. Gillet Y, Etienne J, Lina G, Vandenesch F (2008) Association of necrotizing pneumonia with Pantone-Valentine leukocidin-producing *Staphylococcus aureus*, regardless of methicillin resistance. *Clin Infect Dis* 47: 985–986.
41. Moran GJ, Krishnadasan A, Gorwitz RJ, Fosheim GE, McDougal LK, et al. (2006) Methicillin-resistant *S. aureus* infections among patients in the emergency department. *N Engl J Med* 355: 666–674.
42. Lina G, Piemont Y, Godail-Gamot F, Bes M, Peter MO, et al. (1999) Involvement of Pantone-Valentine leukocidin-producing *Staphylococcus aureus* in primary skin infections and pneumonia. *Clin Infect Dis* 29: 1128–1132.
43. Blaine KP, Tuohy MJ, Wilson D, Procop GW, Tisch DJ, et al. (2010) Progression to bacteremia in critical care patients colonized with methicillin-resistant *Staphylococcus aureus* expressing Pantone-Valentine leukocidin. *Diagn Microbiol Infect Dis* 68: 28–33.
44. Sharma-Kuinkel BK, Ahn SH, Rude TH, Zhang Y, Tong SY, et al. (2012) Presence of Genes Encoding the Pantone Valentine Leukocidin (PVL) is Not The Primary Determinant of Outcome in Patients with Hospital Acquired Pneumonia due to *Staphylococcus aureus*. *J Clin Microbiol*.
45. Campo M, Hachem R, Jiang Y, Dvorak T, Carrillo-Marquez M, et al. (2011) Pantone valentine Leukocidin exotoxin has no effect on the outcome of cancer patients with methicillin-resistant *Staphylococcus aureus* (MRSA) infections. *Medicine (Baltimore)* 90: 312–318.
46. Bae IG, Tonthat GT, Stryjewski ME, Rude TH, Reilly LF, et al. (2009) Presence of genes encoding the pantone-valentine leukocidin exotoxin is not the primary determinant of outcome in patients with complicated skin and skin structure infections due to methicillin-resistant *Staphylococcus aureus*: results of a multinational trial. *J Clin Microbiol* 47: 3952–3957.
47. Chamchod F, Ruan S (2012) Modeling the Spread of Methicillin-Resistant *Staphylococcus aureus* in Nursing Homes for Elderly. *PLoS One* 7: e29757.
48. Robotham JV, Graves N, Cookson BD, Barnett AG, Wilson JA, et al. (2011) Screening, isolation, and decolonisation strategies in the control of methicillin resistant *Staphylococcus aureus* in intensive care units: cost effectiveness evaluation. *BMJ* 343: d5694.
